# Supplementary material for: The Association Between the STOP-Bang Score and the Integrated Pulmonary Index in Patients Undergoing Endobronchial Ultrasound with Sedation: The STOP OSA-IPI Cohort Study
Source: MDPI journal article supplement (doi:10.3390/medicina62061034), 2026-05-26
Supplement: s1 [file medicina-4257192-supplementary.pdf › medicina-4257192-supplementary.pdf]

**Supplementary Table S1.** Distribution of demographic characteristics, comorbidities, ASA scores, vital signs, procedure duration, and doses of medications used for sedation in patients with low IPI and high IPI at 5 minutes during the EBUS procedure

|                                      | Total |                    |    | Low IPI            |    |                    | High IPI           |              |  |
|--------------------------------------|-------|--------------------|----|--------------------|----|--------------------|--------------------|--------------|--|
|                                      | n     | Median (Q1 – Q3)   | n  | Median (Q1 – Q3)   | n  | Median (Q1 – Q3)   | OR (95% CI)        | p-value      |  |
|                                      |       | (%)                |    | (%)                |    | (%)                |                    |              |  |
| Age (years)                          | 65    | 62.0 (53.0 – 71.0) | 18 | 63.0 (50.5 – 72.3) | 47 | 62.0 (53.0 – 71.0) | -                  | 0.883        |  |
| Male gender                          | 33    | 50.8               | 6  | 33.3               | 27 | 57.4               | 0.38 (0.12 – 1.16) | 0.082        |  |
| Body mass index (kg/m <sup>2</sup> ) | 65    | 25.4 (22.7 – 29.6) | 18 | 25.7 (22.9 – 29.5) | 47 | 25.4 (21.6 – 29.8) | -                  | 0.792        |  |
| Neck-height ratio                    | 65    | 0.23 (0.21 – 0.26) | 18 | 0.23 (0.22 – 0.26) | 47 | 0.23 (0.21 – 0.26) | -                  | 0.714        |  |
| Comorbidities*                       | 54    | 83.1               | 13 | 72.2               | 41 | 87.2               | 0.38 (0.10 – 1.46) | 0.161        |  |
| Hypertension                         | 35    | 53.8               | 8  | 44.4               | 27 | 57.4               | 0.59 (0.20 – 1.77) | 0.347        |  |
| Diabetes                             | 14    | 21.5               | 1  | 5.6                | 13 | 27.7               | 0.15 (0.02 – 1.28) | 0.089        |  |
| COPD                                 | 6     | 9.2                | -  | -                  | 6  | 12.8               | -                  | 0.175        |  |
| Asthma                               | 5     | 7.7                | 1  | 5.6                | 4  | 8.5                | 0.63 (0.07 – 6.07) | >0.999       |  |
| Coronary artery disease              | 14    | 21.5               | 1  | 5.6                | 13 | 27.7               | 0.15 (0.02 – 1.28) | 0.089        |  |
| Congestive heart failure             | 5     | 7.7                | -  | -                  | 5  | 10.6               | -                  | 0.311        |  |
| Malignancy                           | 15    | 23.1               | 5  | 27.8               | 10 | 21.3               | 1.42 (0.41 – 4.95) | 0.743        |  |
| Smoking status                       |       |                    |    |                    |    |                    |                    | <b>0.010</b> |  |
| Never smoker                         | 32    | 49.2               | 14 | 77.8               | 18 | 38.3               | 1.00               |              |  |
| Current smoker                       | 15    | 23.1               | 3  | 16.7               | 12 | 25.5               | 0.32 (0.08 – 1.36) |              |  |
| Ex-smoker                            | 18    | 27.7               | 1  | 5.6                | 17 | 36.2               | 0.08 (0.01 – 0.64) |              |  |
| Cumulative smoking (Pack-year)       | 33    | 40.0 (22.5 – 60.0) | 4  | 30.0 (20.0 – 51.3) | 29 | 40.0 (27.5 – 60.0) | -                  | 0.576        |  |
| ASA score                            |       |                    |    |                    |    |                    |                    | 0.172        |  |
| 1                                    | 6     | 9.2                | 3  | 16.7               | 3  | 6.4                | 1.00               |              |  |
| 2                                    | 27    | 41.5               | 9  | 50.0               | 18 | 38.3               | 0.50 (0.08 – 2.99) |              |  |

|                                   |    |                       |    |                       |    |                       |                    |              |
|-----------------------------------|----|-----------------------|----|-----------------------|----|-----------------------|--------------------|--------------|
| 3                                 | 32 | 49.2                  | 6  | 33.3                  | 26 | 55.3                  | 0.23 (0.04 – 1.44) |              |
| Mallampati score                  |    |                       |    |                       |    |                       |                    | 0.371        |
| 1                                 | 5  | 7.7                   | -  | -                     | 5  | 10.6                  | -                  |              |
| 2                                 | 38 | 58.6                  | 10 | 55.6                  | 28 | 59.6                  | -                  |              |
| 3                                 | 17 | 26.2                  | 7  | 38.9                  | 10 | 21.3                  | -                  |              |
| 4                                 | 5  | 7.7                   | 1  | 5.6                   | 4  | 8.5                   | -                  |              |
| MAP (mmHg)                        | 65 | 101.7 (94.5 – 108.5)  | 18 | 99.3 (94.3 – 108.9)   | 47 | 102.0 (94.0 – 108.7)  | -                  | 0.901        |
| Pulse (/min)                      | 65 | 79.0 (70.0 – 89.0)    | 18 | 81.0 (69.5 – 90.3)    | 47 | 79.0 (70.0 – 89.0)    | -                  | 0.814        |
| Oxygen saturation (%)             | 65 | 99.0 (97.5 – 100.0)   | 18 | 99.0 (97.8 – 100.0)   | 47 | 99.0 (97.0 – 99.0)    | -                  | 0.448        |
| Respiratory rate (/min)           | 65 | 18.0 (14.0 – 21.0)    | 18 | 17.5 (14.0 – 19.3)    | 47 | 19.0 (14.0 – 22.0)    | -                  | 0.617        |
| etCO <sub>2</sub> pressure (mmHg) | 65 | 33.0 (30.5 – 36.0)    | 18 | 32.5 (30.8 – 36.3)    | 47 | 33.0 (30.0 – 36.0)    | -                  | 0.791        |
| Baseline IPI                      | 65 | 10.0 (9.0 – 10.0)     | 18 | 10.0 (10.0 – 10.0)    | 47 | 9.0 (8.0 – 10.0)      | -                  | <b>0.010</b> |
| Hypoxemia                         | 1  | 2.1                   | -  | -                     | 1  | 2.1                   | -                  |              |
| Midazolam dose (mg)               | 64 | 2.0 (2.0 – 2.0)       | 18 | 2.0 (1.0 – 2.0)       | 46 | 2.0 (2.0 – 2.0)       | -                  | 0.197        |
| Propofol dose (mg)                | 65 | 450.0 (300.0 – 545.0) | 18 | 450.0 (295.0 – 542.5) | 47 | 450.0 (300.0 – 550.0) | -                  | 0.675        |
| Fentanyl dose (µg)                | 61 | 100.0 (75.0 – 100.0)  | 17 | 100.0 (50.0 – 100.0)  | 44 | 100.0 (75.0 – 100.0)  | -                  | 0.339        |
| Oxygen therapy (L/min)            | 65 | 12.0 (10.0 – 12.0)    | 18 | 12.0 (10.0 – 12.0)    | 47 | 12.0 (10.0 – 12.0)    | -                  | 0.442        |
| STOP-Bang score                   | 65 | 3.0 (2.0 – 4.0)       | 47 | 3.0 (1.8 – 4.0)       | 18 | 4.0 (2.0 – 5.0)       | -                  | 0.223        |
| High                              | 43 | 66.2                  | 11 | 61.1                  | 32 | 68.1                  | 0.74 (0.24 – 2.28) | 0.595        |
| Low                               | 22 | 33.8                  | 7  | 38.9                  | 15 | 31.9                  | 1.00               |              |

OR: Odds ratio, CI: Confidence interval, COPD: Chronic obstructive pulmonary disease, ASA: American Society of Anesthesiologists, MAP: Mean arterial pressure, etCO<sub>2</sub>: end-tidal carbon dioxide, IPI: integrated pulmonary index

\* Hypothyroidism (n=7), Chronic renal failure (n=5), Hyperlipidemia (n=4), Atrial fibrillation (n=4)

Statistically significant *p*-values are shown in bold.

**Supplementary Table S2.** Distribution of demographic characteristics, comorbidities, ASA scores, vital signs, procedure duration, and doses of medications used for sedation in patients with low IPI and high IPI at 10 minutes during the EBUS procedure

|                                | Total |                         |    | Low IPI                 |    |                         | High IPI           |              |  |
|--------------------------------|-------|-------------------------|----|-------------------------|----|-------------------------|--------------------|--------------|--|
|                                | n     | Median (Q1 – Q3)<br>(%) | n  | Median (Q1 – Q3)<br>(%) | n  | Median (Q1 – Q3)<br>(%) | OR (95% CI)        | p-value      |  |
| Age (years)                    | 64    | 62.0 (53.0 – 71.0)      | 16 | 61.0 (51.5 – 71.3)      | 48 | 62.0 (53.3 – 71.0)      | -                  | 0.658        |  |
| Male gender                    | 33    | 51.6                    | 5  | 31.3                    | 28 | 58.3                    | 0.33 (0.10 – 1.08) | 0.060        |  |
| Body mass index (kg/m²)        | 64    | 25.4 (22.5 -29.7)       | 16 | 27.9 (22.1 – 29.7)      | 48 | 25.3 (22.5 – 29.4)      | -                  | 0.577        |  |
| Neck-height ratio              | 64    | 0.23 (0.22 – 0.26)      | 16 | 0.24 (0.22 – 0.26)      | 48 | 0.23 (0.21 – 0.26)      | -                  | 0.858        |  |
| Comorbidities*                 | 53    | 82.8                    | 12 | 75.0                    | 41 | 85.4                    | 0.51 (0.13 – 2.05) | 0.445        |  |
| Hypertension                   | 34    | 53.1                    | 8  | 50.0                    | 26 | 54.2                    | 0.85 (0.27 – 2.63) | 0.772        |  |
| Diabetes                       | 13    | 20.3                    | -  | -                       | 13 | 27.1                    | -                  | <b>0.027</b> |  |
| COPD                           | 6     | 9.4                     | 2  | 12.5                    | 4  | 8.3                     | 1.57 (0.26 – 9.51) | 0.635        |  |
| Asthma                         | 5     | 7.8                     | 1  | 6.3                     | 4  | 8.3                     | 0.73 (0.08 – 7.09) | >0.999       |  |
| Coronary artery disease        | 14    | 21.9                    | 3  | 18.8                    | 11 | 22.9                    | 0.78 (0.19 – 3.23) | >0.999       |  |
| Congestive heart failure       | 5     | 7.8                     | 1  | 6.3                     | 4  | 8.3                     | 0.73 (0.08 – 7.09) | >0.999       |  |
| Malignancy                     | 15    | 23.4                    | 4  | 25.0                    | 11 | 22.9                    | 1.12 (0.30 – 4.18) | >0.999       |  |
| Smoking status                 |       |                         |    |                         |    |                         |                    | <b>0.005</b> |  |
| Never smoker                   | 32    | 50.0                    | 12 | 75.0                    | 20 | 41.7                    | 1.00               |              |  |
| Current smoker                 | 14    | 21.9                    | 4  | 25.0                    | 10 | 20.8                    | 0.67 (0.17 – 2.60) |              |  |
| Ex-smoker                      | 18    | 28.1                    | -  | -                       | 18 | 37.5                    | -                  |              |  |
| Cumulative smoking (Pack-year) | 32    | 40.0 (21.3 – 60.0)      | 4  | 47.5 (40.0 – 79.4)      | 28 | 37.5 (20.0 – 60.0)      | -                  | 0.230        |  |
| ASA score                      |       |                         |    |                         |    |                         |                    | 0.626        |  |
| 1                              | 6     | 9.4                     | 2  | 12.5                    | 4  | 8.3                     | 1.00               |              |  |
| 2                              | 27    | 42.2                    | 8  | 50.0                    | 19 | 39.6                    | 0.84 (0.13 – 5.56) |              |  |
| 3                              | 31    | 48.4                    | 6  | 37.5                    | 25 | 52.1                    | 0.48 (0.07 – 3.26) |              |  |

|                                              |    |                       |    |                       |    |                       |                      |  |                  |
|----------------------------------------------|----|-----------------------|----|-----------------------|----|-----------------------|----------------------|--|------------------|
| Mallampati score                             |    |                       |    |                       |    |                       |                      |  | 0.770            |
| 1                                            | 5  | 7.8                   | -  | -                     | 5  | 10.4                  | -                    |  |                  |
| 2                                            | 38 | 59.4                  | 11 | 68.8                  | 27 | 56.3                  | -                    |  |                  |
| 3                                            | 16 | 25.0                  | 4  | 25.0                  | 12 | 25.0                  | -                    |  |                  |
| 4                                            | 5  | 7.8                   | 1  | 6.3                   | 4  | 8.3                   | -                    |  |                  |
| MAP at minute 5 (mmHg)                       | 64 | 103.7 (88.8 – 119.3)  | 16 | 106.5 (91.3 – 117.7)  | 48 | 102.8 (88.3 – 119.3)  | -                    |  | 0.816            |
| Pulse at minute 5 (/min)                     | 64 | 93.0 (77.3 – 102.8)   | 16 | 100.0 (80.8 – 109.8)  | 48 | 90.0 (73.8 – 101.5)   | -                    |  | 0.119            |
| Oxygen saturation at minute 5 (%)            | 64 | 95.0 (89.3 – 98.0)    | 16 | 86.0 (77.3 – 92.0)    | 48 | 97.0 (93.3 – 99.0)    | -                    |  | <b>&lt;0.001</b> |
| Respiratory rate at minute 5 (/min)          | 64 | 17.0 (13.0 – 20.0)    | 16 | 16.5 (10.5 – 21.0)    | 48 | 17.0 (13.5 – 20.0)    | -                    |  | 0.658            |
| etCO <sub>2</sub> pressure at minute 5(mmHg) | 64 | 35.0 (30.3 – 39.0)    | 16 | 34.0 (31.3 – 46.3)    | 48 | 35.0 (30.0 – 39.0)    | -                    |  | 0.456            |
| IPI score at minute 5                        | 64 | 8.0 (6.0 -10.0)       | 16 | 3.0 (1.0 – 7.8)       | 48 | 9.0 (8.0 – 10.0)      | -                    |  | <b>&lt;0.001</b> |
| Hypoxemia                                    | 18 | 28.1                  | 11 | 68.8                  | 7  | 14.6                  | 12.87 (3.42 – 48.56) |  | 0.774            |
| Midazolam dose (mg)                          | 37 | 57.8                  | 13 | 81.3                  | 24 | 50.0                  | 4.33 (1.09 – 17.17)  |  | <b>0.028</b>     |
| Propofol dose (mg)                           | 17 | 26.6                  | 9  | 56.3                  | 8  | 16.7                  | 6.43 (1.85 – 22.34)  |  | <b>0.007</b>     |
| Fentanyl dose (µg)                           | 63 | 2.0 (2.0 – 2.0)       | 16 | 2.0 (1.0 – 2.0)       | 47 | 2.0 (2.0 – 2.0)       | -                    |  | 0.092            |
| Oxygen therapy (L/min)                       | 64 | 450.0 (300.0 – 547.5) | 16 | 460.0 (350.0 – 547.5) | 48 | 450.0 (285.0 – 547.5) | -                    |  | 0.451            |
| STOP-Bang score                              | 60 | 100.0 (75.0 – 100.0)  | 16 | 100.0 (50.0 – 100.0)  | 44 | 100.0 (75.0 – 100.0)  | -                    |  | 0.381            |
| High                                         | 64 | 12.0 (10.0 – 12.0)    | 16 | 12.0 (10.0 – 12.0)    | 48 | 12.0 (10.0 – 12.0)    | -                    |  | 0.551            |
| Low                                          | 64 | 3.0 (2.0 – 4.0)       | 16 | 3.0 (2.0 – 4.0)       | 48 | 3.5 (2.0 – 4.8)       | -                    |  | 0.782            |

OR: Odds ratio, CI: Confidence interval, COPD: Chronic obstructive pulmonary disease, ASA: American Society of Anesthesiologists, MAP: Mean arterial pressure, etCO<sub>2</sub>: end-tidal carbon dioxide, IPI: integrated pulmonary index

\* Hypothyroidism (n=7), Chronic renal failure (n=5), Hyperlipidemia (n=4), Atrial fibrillation (n=4)

Statistically significant *p*-values are shown in bold.

**Supplementary Table S3.** Distribution of demographic characteristics, comorbidities, ASA scores, vital signs, procedure duration, and doses of medications used for sedation in patients with low IPI and high IPI at 15 minutes during the EBUS procedure

|                                      | Total |                    |    | Low IPI            |    |                    | High IPI            |              |  |
|--------------------------------------|-------|--------------------|----|--------------------|----|--------------------|---------------------|--------------|--|
|                                      | n     | Median (Q1 – Q3)   | n  | Median (Q1 – Q3)   | n  | Median (Q1 – Q3)   | OR (95% CI)         | p-value      |  |
|                                      |       | (%)                |    | (%)                |    | (%)                |                     |              |  |
| Age (years)                          | 60    | 61.5 (53.0 – 71.0) | 19 | 65.0 (53.0 – 69.0) | 41 | 61.0 (53.0 – 71.5) | -                   | 0.987        |  |
| Male gender                          | 32    | 53.3               | 8  | 42.1               | 24 | 58.5               | 0.52 (0.17 – 1.55)  | 0.235        |  |
| Body mass index (kg/m <sup>2</sup> ) | 60    | 25.4 (22.6 – 30.0) | 19 | 24.6 (20.8 – 29.8) | 41 | 25.4 (23.7 – 29.6) | -                   | 0.317        |  |
| Neck-height ratio                    | 60    | 0.23 (0.22 – 0.25) | 19 | 0.22 (0.21 – 0.26) | 41 | 0.23 (0.22 – 0.25) | -                   | 0.373        |  |
| Comorbidities*                       | 49    | 81.7               | 14 | 73.7               | 35 | 85.4               | 0.48 (0.13 – 1.83)  | 0.277        |  |
| Hypertension                         | 30    | 50.0               | 9  | 47.4               | 21 | 51.2               | 0.86 (0.29 – 2.55)  | 0.781        |  |
| Diabetes                             | 13    | 21.7               | 1  | 5.3                | 12 | 29.3               | 0.13 (0.02 – 1.12)  | <b>0.045</b> |  |
| COPD                                 | 6     | 10.0               | 2  | 15.8               | 3  | 7.3                | 2.38 (0.44 – 13.05) | 0.370        |  |
| Asthma                               | 3     | 5.0                | 1  | 5.3                | 2  | 4.9                | 1.08 (0.09 – 12.74) | >0.999       |  |
| Coronary artery disease              | 13    | 21.7               | 6  | 31.6               | 7  | 17.1               | 2.24 (0.63 – 7.93)  | 0.312        |  |
| Congestive heart failure             | 5     | 8.3                | 3  | 15.8               | 2  | 4.9                | 3.66 (0.56 – 24.00) | 0.314        |  |
| Malignancy                           | 14    | 23.3               | 4  | 21.1               | 10 | 24.4               | 0.83 (0.22 – 3.07)  | >0.999       |  |
| Smoking status                       |       |                    |    |                    |    |                    |                     | 0.529        |  |
| Never smoker                         | 29    | 48.3               | 11 | 57.9               | 18 | 43.9               | 1.00                |              |  |
| Current smoker                       | 13    | 21.7               | 4  | 21.1               | 9  | 22.0               | 0.73 (0.18 – 2.94)  |              |  |
| Ex-smoker                            | 18    | 30.0               | 4  | 21.1               | 14 | 34.1               | 0.47 (0.12 – 1.79)  |              |  |
| Cumulative smoking (Pack-year)       | 31    | 40.0 (20.0 – 60.0) | 8  | 35.0 (15.0 – 58.8) | 23 | 40.0 (25.0 – 60.0) | -                   | 0.740        |  |
| ASA score                            |       |                    |    |                    |    |                    |                     |              |  |
| 1                                    | 6     | 10.0               | 3  | 15.8               | 3  | 7.3                | 1.00                |              |  |
| 2                                    | 25    | 41.7               | 8  | 42.1               | 17 | 41.5               | 0.47 (0.08 – 2.87)  |              |  |
| 3                                    | 29    | 48.3               | 8  | 42.1               | 21 | 51.2               | 0.38 (0.06 – 2.29)  |              |  |

|                                      |    |                       |    |                       |    |                       |                     |  |                  |
|--------------------------------------|----|-----------------------|----|-----------------------|----|-----------------------|---------------------|--|------------------|
| Mallampati score                     |    |                       |    |                       |    |                       |                     |  | 0.401            |
| 1                                    | 5  | 8.3                   | -  | -                     | 5  | 12.2                  | -                   |  |                  |
| 2                                    | 34 | 56.7                  | 13 | 68.4                  | 21 | 51.2                  | -                   |  |                  |
| 3                                    | 16 | 26.7                  | 5  | 26.3                  | 11 | 26.8                  | -                   |  |                  |
| 4                                    | 5  | 8.3                   | 1  | 5.3                   | 4  | 9.8                   | -                   |  |                  |
| MAP at minute 10 (mmHg)              | 60 | 93.8 (82.1 – 107.5)   | 19 | 95.0 (86.3 – 112.7)   | 41 | 92.0 (79.8 – 104.8)   | -                   |  | 0.291            |
| Pulse at minute 10 (/min)            | 60 | 89.5 (76.8 – 100.0)   | 19 | 96.0 (75.0 – 103.0)   | 41 | 88.0 (77.5 – 99.5)    | -                   |  | 0.464            |
| Oxygen saturation at minute 10 (%)   | 60 | 96.0 (90.5 – 98.8)    | 19 | 90.0 (85.0 – 96.0)    | 41 | 98.0 (95.0 – 99.0)    | -                   |  | <b>&lt;0.001</b> |
| Respiratory rate at minute 10 (/min) | 60 | 17.0 (13.0 – 20.0)    | 19 | 15.0 (12.0 – 19.0)    | 41 | 17.0 (13.0 – 21.0)    | -                   |  | 0.180            |
| etCO <sub>2</sub> at minute 10(mmHg) | 60 | 33.5 (30.0 – 38.0)    | 19 | 37.0 (32.0 – 42.0)    | 41 | 33.0 (30.0 – 38.0)    | -                   |  | 0.126            |
| IPI score at minute 10               | 60 | 8.0 (5.0 – 10.0)      | 19 | 5.0 (2.0 – 8.0)       | 41 | 9.0 (8.0 – 10.0)      | -                   |  | <b>&lt;0.001</b> |
| Hypoxemia                            | 25 | 41.7                  | 13 | 68.4                  | 12 | 29.3                  | 5.24 (1.61 – 17.01) |  | <b>0.004</b>     |
| Hypoventilation                      | 10 | 16.7                  | 7  | 36.8                  | 3  | 7.3                   | 7.39 (1.65 – 33.12) |  | <b>0.008</b>     |
| Apnea                                | 2  | 3.3                   | -  | -                     | 2  | 4.9                   | -                   |  | -                |
| Midazolam dose (mg)                  | 60 | 2.0 (2.0 – 2.0)       | 19 | 2.0 (1.0 – 2.0)       | 41 | 2.0 (2.0 – 2.0)       | -                   |  | <b>0.011</b>     |
| Propofol dose (mg)                   | 60 | 450.0 (350.0 – 550.0) | 19 | 450.0 (350.0 – 590.0) | 41 | 450.0 (325.0 – 550.0) | -                   |  | 0.981            |
| Fentanyl dose (µg)                   | 56 | 100.0 (75.0 – 100.0)  | 19 | 100.0 (50.0 – 100.0)  | 37 | 100.0 (75.0 – 100.0)  | -                   |  | 0.321            |
| Oxygen therapy (L/min)               | 60 | 12.0 (10.0 – 12.0)    | 19 | 12.0 (10.0 – 12.0)    | 41 | 12.0 (10.0 – 12.0)    | -                   |  | 0.924            |
| STOP-Bang score                      | 60 | 3.0 (2.0 – 4.0)       | 19 | 3.0 (2.0 – 4.0)       | 41 | 3.0 (2.0 – 4.0)       | -                   |  | 0.733            |
| High                                 | 39 | 65.0                  | 13 | 68.4                  | 26 | 63.4                  | 1.25 (0.39 – 3.98)  |  | 0.705            |
| Low                                  | 21 | 35.0                  | 6  | 31.6                  | 15 | 36.6                  | 1.00                |  |                  |

OR: Odds ratio, CI: Confidence interval, COPD: Chronic obstructive pulmonary disease, ASA: American Society of Anesthesiologists, MAP: Mean arterial pressure, etCO<sub>2</sub>: end-tidal carbon dioxide, IPI: integrated pulmonary index

\* Hypothyroidism (n=7), Chronic renal failure (n=5), Hyperlipidemia (n=4), Atrial fibrillation (n=4)

Statistically significant *p*-values are shown in bold.

**Supplementary Table S4.** Distribution of demographic characteristics, comorbidities, ASA scores, vital signs, procedure duration, and doses of medications used for sedation in patients with low IPI and high IPI at 20 minutes during the EBUS procedure

|                                      | Total |                         | Low IPI |                         | High IPI |                         | OR (95% CI)         | p-value |
|--------------------------------------|-------|-------------------------|---------|-------------------------|----------|-------------------------|---------------------|---------|
|                                      | n     | Median (Q1 – Q3)<br>(%) | n       | Median (Q1 – Q3)<br>(%) | n        | Median (Q1 – Q3)<br>(%) |                     |         |
| Age (years)                          | 58    | 62.0 (53.0 – 71.3)      | 14      | 61.5 (53.0 – 65.55)     | 44       | 62.5 (53.3 – 72.8)      | -                   | 0.200   |
| Male gender                          | 30    | 51.7                    | 5       | 35.7                    | 25       | 56.8                    | 0.42 (0.12 – 1.47)  | 0.169   |
| Body mass index (kg/m <sup>2</sup> ) | 58    | 25.4 (22.2 – 29.8)      | 14      | 22.7 (19.6 – 27.3)      | 44       | 25.9 (23.6 – 31.0)      | -                   | 0.023   |
| Neck-height ratio                    | 58    | 0.23 (0.22 – 0.26)      | 14      | 0.22 (0.21 – 0.24)      | 44       | 0.23 (0.22 – 0.26)      | -                   | 0.066   |
| Comorbidities*                       | 48    | 82.8                    | 10      | 71.4                    | 38       | 86.4                    | 0.40 (0.09 – 1.67)  | 0.233   |
| Hypertension                         | 29    | 50.0                    | 7       | 50.0                    | 22       | 50.0                    | 1.00 (0.30 – 3.33)  | >0.999  |
| Diabetes                             | 12    | 20.7                    | 2       | 14.3                    | 10       | 22.7                    | 0.57 (0.11 – 2.96)  | 0.711   |
| COPD                                 | 6     | 10.3                    | 2       | 14.3                    | 4        | 9.1                     | 1.67 (0.27 – 10.24) | 0.624   |
| Asthma                               | 3     | 5.2                     | -       | -                       | 3        | 6.8                     | -                   | >0.999  |
| Coronary artery disease              | 13    | 22.4                    | 4       | 28.6                    | 9        | 20.5                    | 1.56 (0.40 – 6.13)  | 0.714   |
| Congestive heart failure             | 5     | 8.6                     | 3       | 21.4                    | 2        | 4.5                     | 5.73 (0.85 – 38.61) | 0.085   |
| Malignancy                           | 14    | 24.1                    | 1       | 7.1                     | 13       | 29.5                    | 0.18 (0.02 – 1.55)  | 0.151   |
| Smoking status                       |       |                         |         |                         |          |                         |                     | 0.272   |
| Never smoker                         | 28    | 48.3                    | 8       | 57.1                    | 20       | 45.5                    | 1.00                |         |
| Current smoker                       | 12    | 20.7                    | 4       | 28.6                    | 8        | 18.2                    | 1.25 (0.29 – 5.35)  |         |
| Ex-smoker                            | 18    | 31.0                    | 2       | 14.3                    | 16       | 36.4                    | 0.31 (0.06 – 1.68)  |         |
| Cumulative smoking (Pack-year)       | 30    | 40.0 (20.0 – 60.0)      | 6       | 45.0 (37.5 – 63.1)      | 24       | 37.5 (16.3 – 60.0)      | -                   | 0.273   |
| ASA score                            |       |                         |         |                         |          |                         |                     | 0.168   |
| 1                                    | 5     | 8.6                     | 3       | 21.4                    | 2        | 4.5                     | 1.00                |         |
| 2                                    | 25    | 43.1                    | 5       | 35.7                    | 20       | 45.5                    | 0.17 (0.02 – 1.28)  |         |
| 3                                    | 28    | 48.3                    | 6       | 42.9                    | 22       | 50.0                    | 0.18 (0.03 – 1.35)  |         |

|                                                |    |                       |    |                       |    |                       |                     |  |        |
|------------------------------------------------|----|-----------------------|----|-----------------------|----|-----------------------|---------------------|--|--------|
| Mallampati score                               |    |                       |    |                       |    |                       |                     |  | 0.127  |
| 1                                              | 5  | 8.6                   | 2  | 14.3                  | 3  | 6.8                   | 1.00                |  |        |
| 2                                              | 32 | 55.2                  | 9  | 64.3                  | 23 | 52.3                  | 0.59 (0.08 – 4.12)  |  |        |
| 3                                              | 16 | 27.6                  | 1  | 7.1                   | 15 | 34.1                  | 0.10 (0.01 – 1.49)  |  |        |
| 4                                              | 5  | 8.6                   | 2  | 14.3                  | 3  | 6.8                   | 1.00 (0.08 – 12.56) |  |        |
| MAP at minute 15 (mmHg)                        | 58 | 113.0 (95.8 – 131.0)  | 14 | 102.5 (94.8 – 122.8)  | 44 | 116.0 (99.0 – 134.0)  | -                   |  | 0.148  |
| Pulse at minute 15 (/min)                      | 58 | 68.0 (58.0 – 81.0)    | 14 | 66.5 (56.0 – 74.8)    | 44 | 68.0 (60.3 – 81.0)    | -                   |  | 0.393  |
| Oxygen saturation at minute 15(%)              | 58 | 82.0 (71.6 – 96.3)    | 14 | 78.7 (69.8 – 88.5)    | 44 | 84.3 (72.8 – 97.4)    | -                   |  | 0.203  |
| Respiratory rate at minute 15 (/min)           | 58 | 86.0 (73.0 – 97.0)    | 14 | 89.5 (84.0 – 100.0)   | 44 | 85.5 (70.5 – 96.8)    | -                   |  | 0.154  |
| etCO <sub>2</sub> pressure at minute 15 (mmHg) | 58 | 97.0 (91.0 – 99.0)    | 14 | 88.0 (84.5 – 95.8)    | 44 | 98.0 (94.0 – 99.0)    | -                   |  | 0.001  |
| IPI score at minute 15                         | 58 | 17.5 (13.0 – 21.3)    | 14 | 20.0 (16.0 – 22.0)    | 44 | 17.0 (13.0 – 21.0)    | -                   |  | 0.228  |
| Hypoxemia                                      | 58 | 33.0 (29.0 – 41.3)    | 14 | 32.0 (26.8 – 44.5)    | 44 | 33.5 (29.3 – 41.0)    | -                   |  | 0.636  |
| Hypoventilation                                | 58 | 8.0 (6.0 – 9.0)       | 14 | 4.5 (2.8 – 7.3)       | 44 | 8.5 (7.0 – 10.0)      | -                   |  | <0.001 |
| Apnea                                          | 19 | 32.8                  | 10 | 71.4                  | 9  | 20.5                  | 9.72 (2.47 – 38.32) |  | 0.001  |
| Midazolam dose (mg)                            | 20 | 34.5                  | 9  | 64.3                  | 11 | 25.0                  | 5.40 (1.49 – 19.59) |  | 0.011  |
| Propofol dose (mg)                             | 11 | 19.0                  | 4  | 28.6                  | 7  | 15.9                  | 2.11 (0.52 – 8.69)  |  | 0.433  |
| Fentanyl dose (µg)                             | 58 | 2.0 (2.0 – 2.0)       | 14 | 2.0 (1.4 – 2.0)       | 44 | 2.0 (2.0 – 2.0)       | -                   |  | 0.265  |
| Oxygen therapy (L/min)                         | 58 | 450.0 (350.0 – 550.0) | 14 | 375.0 (257.5 – 475.0) | 44 | 470.0 (355.0 – 580.0) | -                   |  | 0.022  |
| STOP-Bang score                                | 54 | 100.0 (75.0 – 100.0)  | 14 | 100.0 (75.0 – 100.0)  | 40 | 100.0 (75.0 – 100.0)  | -                   |  | 0.901  |
| High                                           | 58 | 12.0 (10.0 – 12.0)    | 14 | 12.0 (10.0 – 12.0)    | 44 | 12.0 (10.0 – 12.0)    | -                   |  | 0.736  |
| Low                                            | 58 | 3.0 (2.0 – 4.0)       | 14 | 2.5 (1.8 – 4.0)       | 44 | 3.5 (2.0 – 4.0)       | -                   |  | 0.207  |

OR: Odds ratio, CI: Confidence interval, COPD: Chronic obstructive pulmonary disease, ASA: American Society of Anesthesiologists, MAP: Mean arterial pressure, etCO<sub>2</sub>: end-tidal carbon dioxide, IPI: integrated pulmonary index

\*Hypothyroidism (n=7), Chronic renal failure (n=5), Hyperlipidemia (n=3), Atrial fibrillation (n=4)



Statistically significant *p*-values are shown in bold.

**Supplementary Table S5.** The association between low integrated pulmonary index / hypoxia and STOP-Bang score / high obstructive sleep apnea risk according to the STOP-Bang score using the logistic regression analysis

| Low IPI                  |                    |         |                     |         |                       |         |                     |         |                     |         |
|--------------------------|--------------------|---------|---------------------|---------|-----------------------|---------|---------------------|---------|---------------------|---------|
|                          | Min 5              |         | Min 10              |         | Min 15                |         | Min 20              |         | Ever                |         |
|                          | OR (95% CI)        | p-value | OR (95% CI)         | p-value | OR (95% CI)           | p-value | OR (95% CI)         | p-value | OR (95% CI)         | p-value |
| STOP-Bang score          | 0.80 (0.50 – 1.26) | 0.331   | 1.15 (0.74 – 1.80)  | 0.530   | 1.18 (0.75 – 1.85)    | 0.471   | 1.03 (0.62 – 1.71)  | 0.904   | 0.66 (0.43 – 1.02)  | 0.061   |
| STOP-Bang score $\geq 3$ | 1.05 (0.23 – 4.84) | 0.954   | 3.94 (0.60 – 25.99) | 0.155   | 3.97 (0.70 – 22.41)   | 0.119   | 1.01 (0.21 – 4.83)  | 0.993   | 0.27 (0.07 – 1.14)  | 0.075   |
| Hypoxemia                |                    |         |                     |         |                       |         |                     |         |                     |         |
|                          | Min 5              |         | Min 10              |         | Min 15                |         | Min 20              |         | Overall             |         |
|                          | OR (95% CI)        | p-value | OR (95% CI)         | p-value | OR (95% CI)           | p-value | OR (95% CI)         | p-value | OR (95% CI)         | p-value |
| STOP-Bang score          | 1.26 (0.85 – 1.86) | 0.243   | 1.17 (0.80 – 1.72)  | 0.421   | 1.65 (1.02 – 2.67)    | 0.040   | 1.23 (0.77 – 1.97)  | 0.398   | 1.29 (0.82 – 2.03)  | 0.280   |
| STOP-Bang score $\geq 3$ | 1.79 (0.51 – 6.32) | 0.363   | 2.20 (0.55 – 8.74)  | 0.265   | 14.63 (2.02 – 105.87) | 0.008   | 2.31 (0.41 – 13.16) | 0.347   | 3.54 (0.83 – 15.21) | 0.089   |

Adjusted for age, gender, cumulative smoking (pack-year), presence of any comorbidity, midazolam, and propofol dose

Min: Minute, OR: Odds ratio, CI: Confidence interval, IPI: integrated pulmonary index
